# Supplementary material for: miR-335 promotes ferroptosis by targeting ferritin heavy chain 1 in in vivo and in vitro models of Parkinson's disease
Source: PubMed Central journal article supplement — Int J Mol Med. 2021 Feb 23;47(4):61. doi: 10.3892/ijmm.2021.4894 (PMC7910012; doi:10.3892/ijmm.2021.4894), 2021-02-23

Figure S1. PC12 cells were co-treated with 6-OHDA and Z-VAD-FMK (apoptosis inhibitor). The level of lipid peroxidation and the expression of TH, GPX4 and FTH1 were not affected by the apoptosis inhibitor, Z-VAD-FMK, compared with the model group. (A) The expression of TH, GPX4 and FTH1 was determined by western blot analysis ( $P>0.05$ ,  $P>0.05$  and  $P>0.05$  vs. model group). There was no significant difference in the protein expression of TH, GPX4 and FTH1 between the model group and Z-VAD-FMK group. (B) Fluorescent C11-BODIPY staining and FACS analysis were used to evaluate the formation of lipid peroxides ( $P>0.05$  vs. model group). There was no significant difference in the level of lipid peroxidation between the model group and Z-VAD-FMK group. TH, tyrosine hydroxylase; GPX4, glutathione peroxidase 4; FTH1, ferritin heavy chain 1; 6-OHDA, 6-hydroxydopamine.

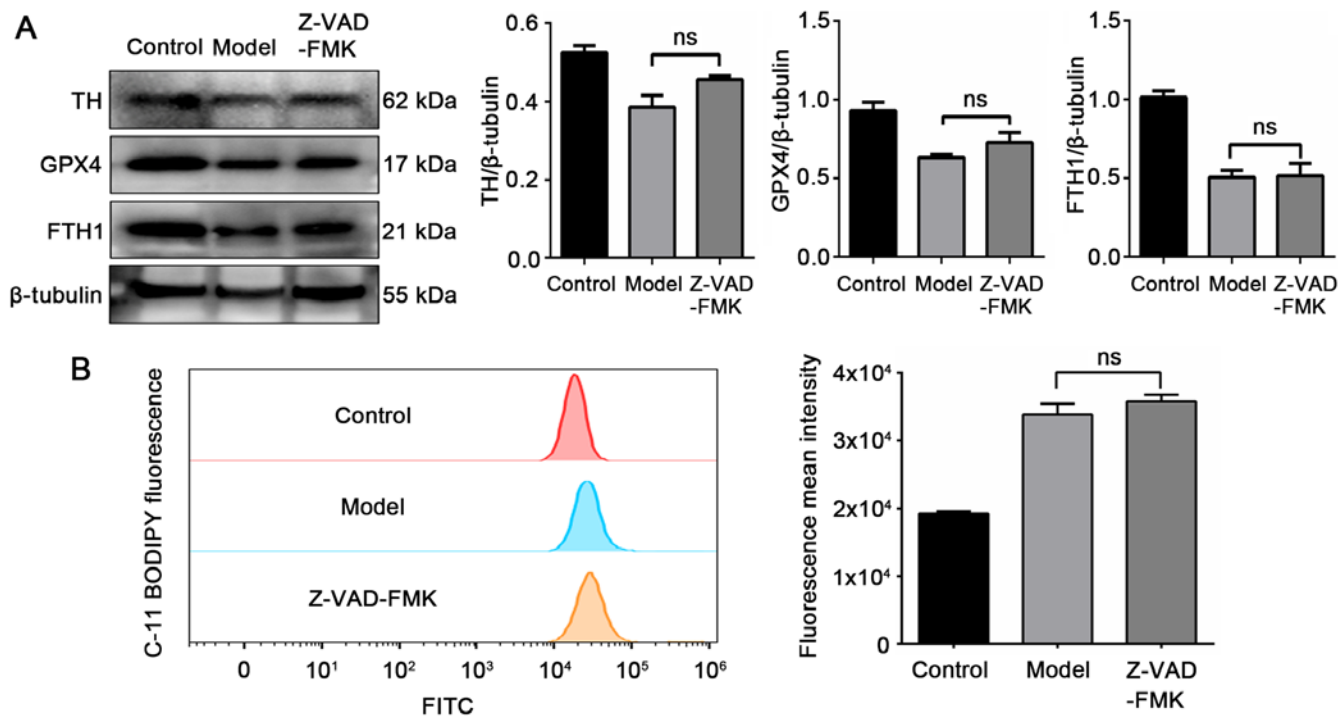

Figure S2. miR-335 further leads to the accumulation of ferrous ions in 6-OHDA-stimulated cells. Ferrous ion staining (red) was performed using the FeRhoNox-1 fluorescence imaging probe. 6-OHDA, 6-hydroxydopamine.

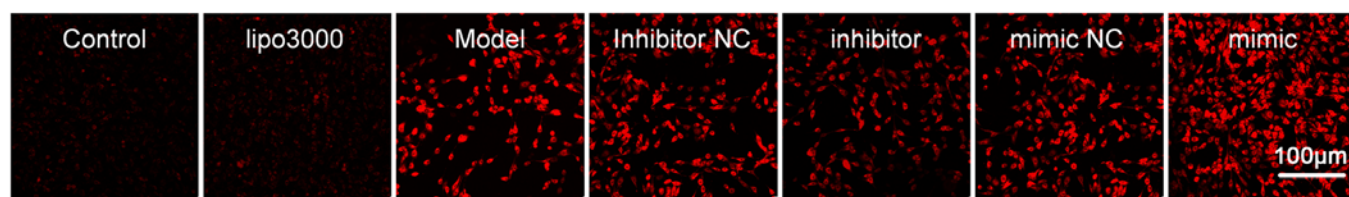

Figure S3. siRNA-FTH1 increases ferrous ion accumulation in 6-OHDA-stimulated cells. A FeRhoNox-1 fluorescence imaging probe was used for ferrous ion imaging of model cells and 6-OHDA-induced cells transfected with siRNA-FTH1. FTH1, ferritin heavy chain 1; 6-OHDA, 6-hydroxydopamine.

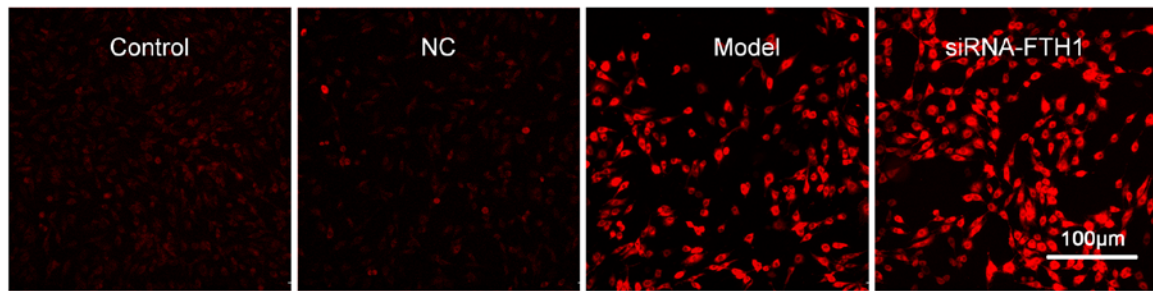

Supplement: Supplementary_Data.pdf [file Supplementary_Data.pdf]
